# Supplementary material
Source: PubMed Central journal article supplement (PMC2878071)
Supplement: supp_M109.098236_jbc.M109.098236-1.pdf [file supp_M109.098236_jbc.M109.098236-1.pdf]

| EMSA Templates     | Oligos                                                                                       |
|--------------------|----------------------------------------------------------------------------------------------|
| 1                  | F: GATTCCTCTTTTTGTCTTT<br>R: GTCCGGGTGACATACTTGATC                                           |
| 2                  | F: GTATGTCACCCGGACTTTGG<br>R: CTTACCCTGCTGGGAAGAA                                            |
| 3                  | F: GTAGCTGAATGGAATTACTAC<br>R: GATGACCTTTCTCCACTGC                                           |
| 4                  | F: CGTCACCTCTTTCCAGTAGAA<br>R: AAGCAGTAAGGGCCAGCCC                                           |
| 1a                 | F: TTTTATTGACCAAGACAGATTTCAAATGTTTTCTCTAATA<br>R: TTATTAGAGAAAACATTTTGAAATCTGTCTTGGTCAATAAA  |
| 1b                 | F: TATTGAGGTTTTCAGGAAATTCAGGGAT<br>R: TATCCCTGGAATTTCTGAAAACCTCAAT                           |
| 2a                 | F: CTTTCCAGGTTTCCCAAAGCCTTGAAATTTCCCTAG<br>R: ATGTAGGGAAATTTCAAGGCTTTGGGAAAACCTGGAA          |
| 2b                 | F: ATGTCTAATTGCTGTTTATTGCCACAGACCTTCA<br>R: ATTGAAGGTCTGTGGCAATAAACAGCAATTAGAC               |
| 2c                 | F: TTTTTTCTTTTGTAACATTTTCCATCTTAAGAA<br>R: TTTCTTAAGATGGAAAATGTTACAAAAGAAAA                  |
| 3a                 | F: TAATGGAATTACTACCAGTGGAAGCTATGCTGCAAGAGAGG<br>R: TCCTCTCTTGCAGCATAGTTTCCACTGGTAGTAATTCCATT |
| 3b                 | F: TTTCTCCCAAGCAAAGTTAATTAGCATAGGGAAAATGACT<br>R: TAGTCATTTTCCCTATGCTAATTAACCTTTGCTTGGGGAGAA |
| 4a                 | F: TTCACCTCTTTCCAGTAGAACTTACAC<br>R: TGTGTAAGTTTCTACTGGAAAGAGGTGA                            |
| 4b                 | F: ACTCAGGAATTTGCTGTCCAAACAGGATGCTGTGGAAGC<br>R: GCTTCCACAGCATCCTGTTTGGACAGCAAATTCCTGAGT     |
| C/EBP $\beta$      | F: GATCCTAGATATCCCTGATTGCGCAATAGGCTCAAAGCTG<br>R: AATTCAGCTTTGAGCCTATTGCGCAATCAGGGATATCTAG   |
| NFAT               | F: CCCAAAGAGGAAAATTTGTTTCATACAG<br>R: CTGTATGAAACAAATTTTCTCTTTGGG                            |
| NFAT-C/EBP $\beta$ | F: GGAAAATTGATTGCGCAATC<br>R: GATTGCGCAATCAATTTTCC                                           |
| Non-specific       | F: AGAGTGTGTCTGAGTAGCTGAATGGAA<br>R: TTCCATTCAGCTACTCAGACAACACGCT                            |

Table S1:
