# Supplementary material
Source: PubMed Central journal article supplement (PMC2878071)
Supplement: supp_M109.098236_jbc.M109.098236-2.pdf [file supp_M109.098236_jbc.M109.098236-2.pdf]

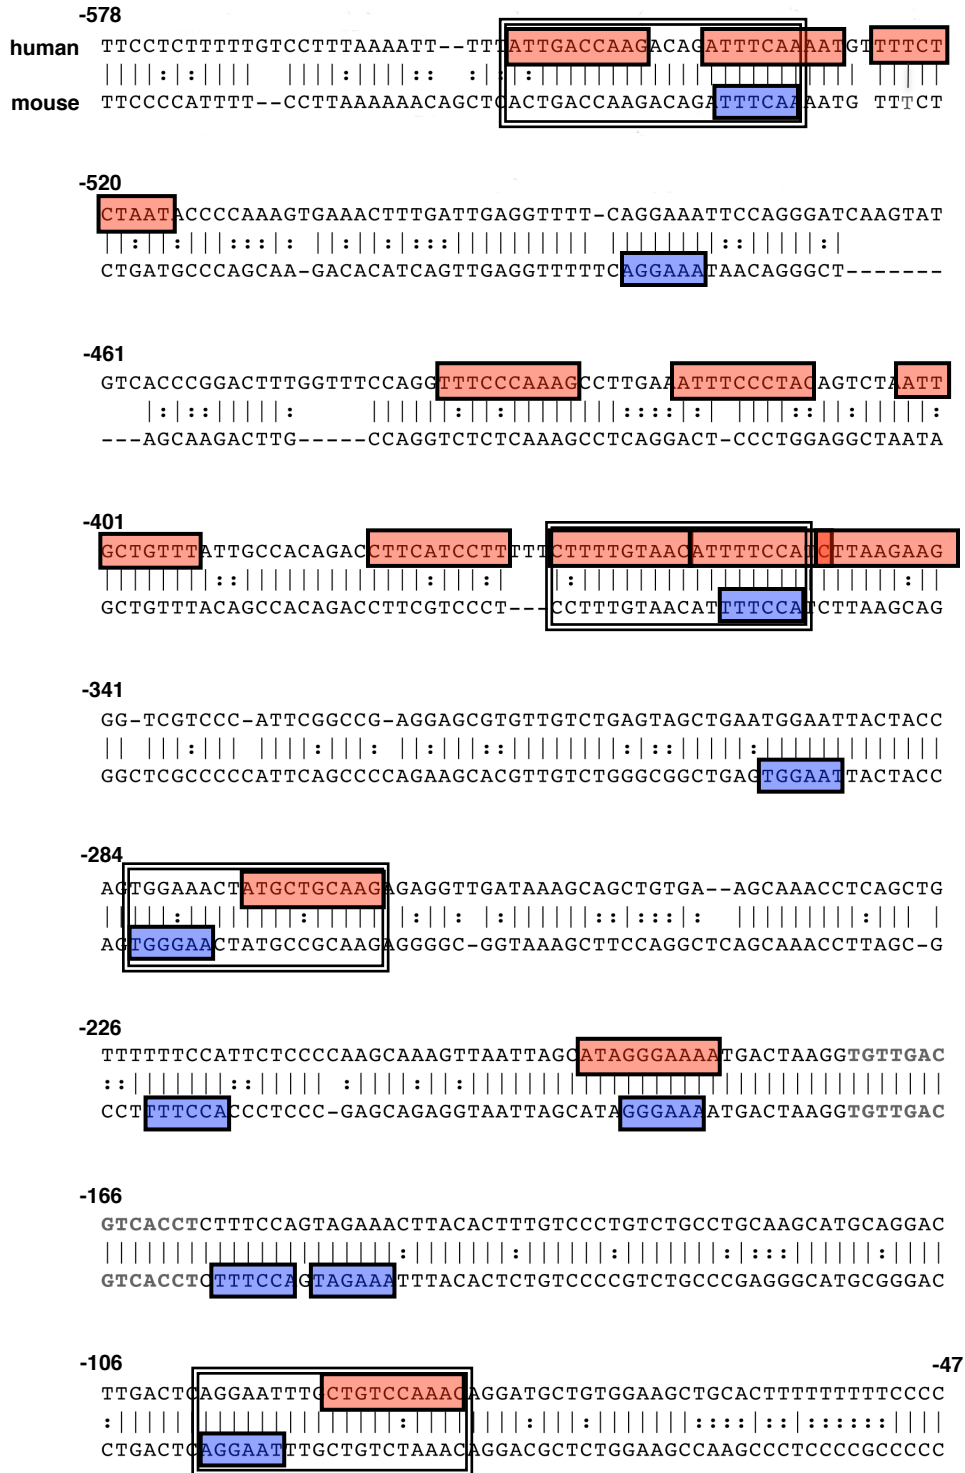

**Figure S1:** Alignment of the human and mouse *Rcan1-4* promoter sequences. Conserved C/EBP $\beta$  binding sites are indicated by the red rectangles on the human sequence. Conserved NFAT sites are indicated by the blue rectangles on the mouse sequence. Potential NFAT-C/EBP $\beta$  composite sites are bounded by the four large rectangles.
